# Supplementary material
Source: publisher figshare collection journal article supplement (https://acs.figshare.com/ndownloader/files/3761215)
Supplement: Supplementary file 1 [file 3761215]

## Supplementary Figure

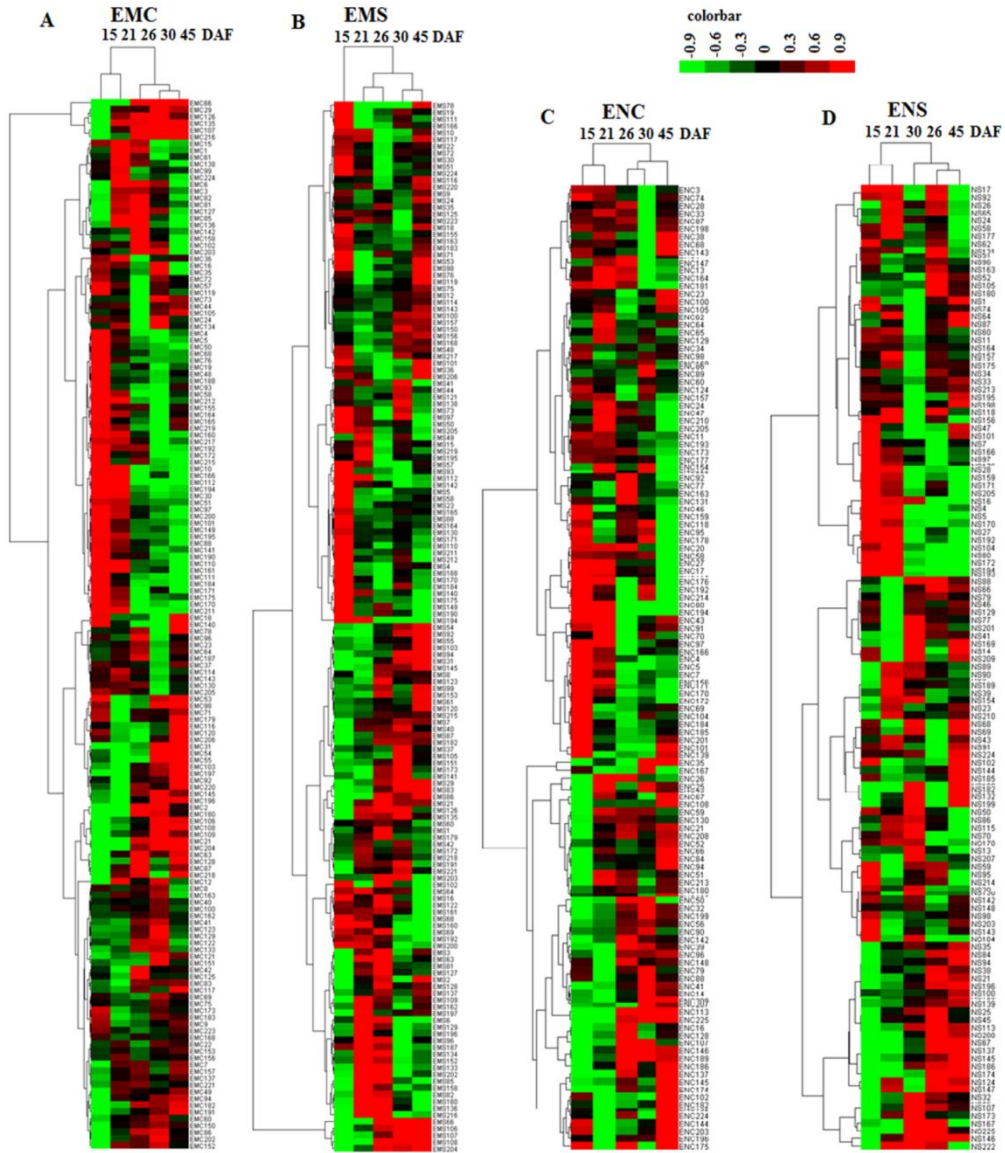

Figure S1. Hierarchical clustering of identified proteins in both control and stressed embryo and endosperm during the grain development. (A) EMC, control embryo; (B) EMS, stressed embryo; (C) ENC, control endosperm; (D) ENS, stressed endosperm. DAF, day after flower. Red indicates high accumulation. Green indicates low accumulation.
